# Supplementary material for: Target Motifs Affecting Natural Immunity by a Constitutive CRISPR-Cas System in Escherichia coli
Source: PubMed Central journal article supplement (PMC3506596; doi:10.1371/journal.pone.0050797), 2012-11-26
Supplement: pone.0050797.s001.pdf [file pone.0050797.s001.pdf]

PAM

GATCTGAACAGCTATTGCATCAGCAGACCTGCAGCCACCTTCTTTCTGCGCGCCAGCGGTTGAATCGATGAACCAGGCTGGCG  
CTTCCAGCCACTGCGCGCCTTGTTCGGTCAGCGCAATCTGCTTCTTACCACCTTTCCTCTTCGCGAATGGTAATCAGCGACTG  
GCAATGGCTTCTGAGGCAGCGCCGGACGCCCTTTTGCCAGGATGTAAGCGCATTTCTGGCGATAGCCACATATGCGGCCTT  
TTCGGCGCTGAATATCACCGTCTTTGTTGACCAGTGTTTTTAGTGACAAACGCTGCATGGTTTTTTCGTAGTGTGTATCCCTT  
CATCCATATTATTTTCTGAACAGTCTGTTTAACAGGACGAACCTCCAGGTATACCAAGTTATCTTCTTTATTAACCGCCCA  
TGGCGGCTCGATCGTTCTGGAGATCGGGGAGCAAAAACACGCAAGGGATTTTGGAGCGGCAAAAAGAGCAATGCAGGATAGAC  
CGGAAGAAATACCGGATTCAGTCCCGTGGTCTTCCGGGATGTCTCCAGGCGCGCCAGGACGGTTCGATTTTCATGATCGGA  
CCTCGCCGTCAAAAAAGACGACGGCTGCGGTATTCCACGGTTCGGCCTGACCCGTTACCAGGACGCGGTGAACAGCCCACAGGCA  
GAAAAAAGATGCGCTGATGGTGAGCTTCTATGGCTGGAACCGCGTCGATCGCTTTTATGGCCGCTGGAAAAATGCGGGATT  
GCGCGAAAAACGCTTACAGAGGCTCTCAGGAGGTCAAGCGCGCCGATACCCCTAACAGGGGCTTTCAGGTCGCCAGGAACC  
TGTCGCATCCAGGATGAAACAACGTGTGTCGCATCCTGGATGCGACAACACGCAACAAAGGTGTGCCACAGATGTGTCAATGATG  
TTCAAGGTTTACACAGGATACCAAAAAGGTTGGGAACGTGTTCGAGAGCTGCTGAAAGGATAGCCAAGGCATATCAGCACTG  
GCTTTAACGGTGGTGTCTGAACCGTGTTCCTTCTGCATATCACTGGTATACGGAACAGTATGGCGTGAAGTGGCCTTGTGG  
CAGCCGTCAACTTCGTACCCCTCGACAACCTGTTTTCGTTAGTTCGCCGAAATTTTCTGGTGCACCTCGCGCCGAAAAATCAA  
GATATCGAACCGCATCTCGACAGGGTTGAATCCCTTGCGCGTGACGATACCGATGACGGGGTTGAGTGGGCTGATAAATAT  
CACAGCGGGAAAACAGGCCGAGAGGTGGCGGCAGGAGGGAGGACTGCTGCGCCATCAGGCGCAGTTTCTCACACCCGTCA  
ATCGTTGCCAAAACAGGTAAGGCAGAAAAGGAGAGACGGTTCGCACTCTTCAACGTTTCAGAGTGACAGGTTTCGCATATTGCATG\*  
CTGTTCTTTCAGTGACTTAAGGGTAGGTACAAAAGACGCCAGACGCATCAGCGCCACAAGTTGTACGGTGTGTATTGTTTG\*  
CATCTTTGCTTTACGGTTTTTTCATCTTACTGCGTACCCTTTCTTCCGCTGTTCGTGACGCGCTGGGCTTTTTGCAACAAC\*  
ATTGCTAAGGCAATGAATGAGGCAGACTTAGTTGTGGATGTCAGTACCACCTTTGAGGTGCCGAGGACTCTAGCGTTAAAAG  
AACCCAGACCCCATCGCTGCAACACCGACGGTCTACGACCACCTACCAACCGCATGGCTGCCTGTTCCGTGCAAAATGGGC  
ACCGAGGATCTCGAAGAAGCAAAGAAAAATTCAGGTTTACACAGGTATCCCCAAAAGGTTGGGAACGTGTTTCGAGAGCTGC  
TCACTTTGTGGGCTGAGCCAGGAGACATCAACATCCACTTTCATTTGCTGAATACAGCGGCGTGCCATCCGTACCACAAAAGC  
GTCGGCAAGTGCATACATAATGCGGGCGTTCGCAAAGGTTTTTACCACACCCCGTCCAGGCCATATTGACGCCGAAAAATCCC  
ACTATGTTCTAGCTCCGCCAGTTTGTGTCATTATTGGCAGACAGGATCCGCGGCAAAGCGTTAATCGTCCGGTAGTCCGCG  
CTGGA AAAATGCCGGTACAGGTGAATGGTGGGCGGGTGGAGTATGTTACCAGCGAAAGGTAAAGAGTCGTACTACTGGAATA  
TGCGGAAGTGTCTCGCAAGAGTCCGCCGAGGAGCAACAGTTCTGTTAAGTACGAAAGGCAGCTGCATACCGGGCGCTGG  
CTTTAGTCACCAATTGTCTCAGTAAGGTATAAAAAGTTCGAGTTTTTTCTTTTCGGTTGACGGCAGGCCACACCGCGACTGTTAC  
CAGTCAGCATTAAGTTGCTTCTCCAGCCAACCTTTACACCCCTTTTACATGATTGTTCCGACTGTGGAGAAAGATTCTCCGGCA  
ACCGCATGGCTGCCTGTTCCGTGCAAAATGGCTTTGCGAGGGGGCTGGCGCGGTTTCCTGGCGACCTGAAAGCCCCCTGGTTAGG  
CGTGAAATTAATGGCGGATTATATATATATCAGGCTCGCCAATTGTTAGTTTTAAACGTGGAGATAGACCCAAATGGCTGAAAA  
ATCGAAGCCAATACGACCGCGGATAAACATGATGTGATCGGCTCTTCCGGCCACCAAGTTTTACTTGTGCGGCTTTAACG  
TCCGGGACGCCAATCCCGACGCCAGATTTTGTGCGGCTACTGGGAATATAGCCCCGGATAACTGTTTGTGTCAATTAAGTGC  
AGGGTAACGGGCCACGCTGGCGCGTCCGCCGTTACCCTTCCCGTTTGTGATGTGTCCGGAATGTTTTTCTGATGTTATGT  
CTCAATTTTCAAATAGCCCGTTCAGTTTCGCTGCAACCATTAGCCAAAACGGTAGGCTGGCTGATCCTTTCCCATCATCGAAT  
GAGGAACACGTAACGCCACCCTTTTACCGCATCGCCATTGTGTGATCCATGATGTGGTTCATGCCGGGATCGCCTGCTTCT
