# Supplementary material for: Target Motifs Affecting Natural Immunity by a Constitutive CRISPR-Cas System in Escherichia coli
Source: PubMed Central journal article supplement (PMC3506596; doi:10.1371/journal.pone.0050797), 2012-11-26

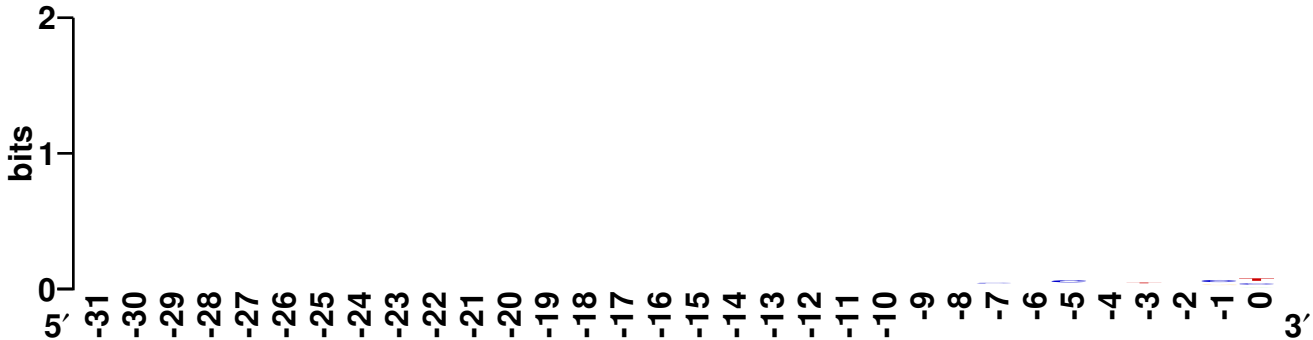

Supplement: pone.0050797.s002.pdf [file pone.0050797.s002.pdf]
