# Supplementary material for: Target Motifs Affecting Natural Immunity by a Constitutive CRISPR-Cas System in Escherichia coli
Source: PubMed Central journal article supplement (PMC3506596; doi:10.1371/journal.pone.0050797), 2012-11-26
Supplement: pone.0050797.s004.pdf [file pone.0050797.s004.pdf]

**Table S1.** Plasmids constructed in this work carrying inserts with protospacer #1 and distinct PAM regions.

| <b>Plasmid</b>  | <b>PAM region</b> |
|-----------------|-------------------|
| <b>pCAR-GGC</b> | GGC               |
| <b>pCAR-AGC</b> | AGC               |
| <b>pCAR-AAC</b> | AAC               |
| <b>pCAR-ATT</b> | ATT               |
| <b>pCAR-GGG</b> | GGG               |
| <b>pCAR-CCC</b> | CCC               |
| <b>pCAR-GTT</b> | GTT               |
| <b>pCAR-TGT</b> | TGT               |
| <b>pCAR-TTG</b> | TTG               |
| <b>pCAR-GAC</b> | GAC               |
| <b>pCAR-TTT</b> | TTT               |
| <b>pCAR-TGC</b> | TGC               |
| <b>pCAR-AAG</b> | AAG               |
