# Supplementary material for: Target Motifs Affecting Natural Immunity by a Constitutive CRISPR-Cas System in Escherichia coli
Source: PubMed Central journal article supplement (PMC3506596; doi:10.1371/journal.pone.0050797), 2012-11-26
Supplement: pone.0050797.s005.pdf [file pone.0050797.s005.pdf]

**Table S2.** Primers used for PCR reactions.

| <b>Name</b>       | <b>Sequence<sup>a</sup></b> | <b>Purpose</b>                                 |
|-------------------|-----------------------------|------------------------------------------------|
| <b>PAM.F</b>      | GCCAGCAGCTTTCCAGCGAGCG      | Synthesis of protospacer #1 - GGC <sup>a</sup> |
| <b>PAM23.F</b>    | GCTAGCAGCTTTCCAGCGAGCG      | Synthesis of protospacer #1 - AGC <sup>a</sup> |
| <b>PAM3.F</b>     | GTTAGCAGCTTTCCAGCGAGCG      | Synthesis of protospacer #1 - AAC <sup>a</sup> |
| <b>CR23.F</b>     | AATAGCAGCTTTCCAGCGAGCG      | Synthesis of protospacer #1 - AAT <sup>a</sup> |
| <b>3G.F</b>       | CCCAGCAGCTTTCCAGCGAGCG      | Synthesis of protospacer #1 - GGG <sup>a</sup> |
| <b>3C.F</b>       | GGGAGCAGCTTTCCAGCGAGCG      | Synthesis of protospacer #1 - CCC <sup>a</sup> |
| <b>LAG.F</b>      | AACAGCAGCTTTCCAGCGAGCG      | Synthesis of protospacer #1 - GTT <sup>a</sup> |
| <b>LA2G.F</b>     | ACAAGCAGCTTTCCAGCGAGCG      | Synthesis of protospacer #1 - TGT <sup>a</sup> |
| <b>LA3G.F</b>     | CAAAGCAGCTTTCCAGCGAGCG      | Synthesis of protospacer #1 - TTG <sup>a</sup> |
| <b>PAM1.F</b>     | TTCAGCAGCTTTCCAGCGAGCG      | Synthesis of protospacer #1 - GAC <sup>a</sup> |
| <b>LA4G.F</b>     | CAAAGCAGCTTTCCAGCGAGCG      | Synthesis of protospacer #1 - TTT <sup>a</sup> |
| <b>PAM23T.F</b>   | GCAAGCAGCTTTCCAGCGAGCG      | Synthesis of protospacer #1 - TGC <sup>a</sup> |
| <b>2SPA4.1.F</b>  | CTTAGCAGCTTTCCAGCGAGCG      | Synthesis of protospacer #1 - AAG <sup>a</sup> |
| <b>SPA4.1_B.R</b> | GAGTGAGTTAACCGCGCTCG        | Amplification of protospacer #1 <sup>a</sup>   |
| <b>RTCAS1.F</b>   | GGTACAGGTAATGGT             | Amplification of <i>cas1</i> <sup>b</sup>      |
| <b>RTCAS1.R</b>   | TCGTTTGTCTTCAACA            | Amplification of <i>cas1</i> <sup>b</sup>      |
| <b>RTCSY1.F</b>   | TCAGTCATGGTGATTCT           | Amplification of <i>csy1</i> <sup>b</sup>      |
| <b>RTCSY1.R</b>   | GCAACAGGGAAATAGA            | Amplification of <i>csy1</i> <sup>b</sup>      |
| <b>RTTUFB.F</b>   | TACTATCGGCCAGTT             | Amplification of <i>tufB</i> <sup>b</sup>      |
| <b>RTTUFB.R</b>   | GATGATACCGCGTTCTA           | Amplification of <i>tufB</i> <sup>b</sup>      |

<sup>a</sup> Cloning experiments.

<sup>b</sup> RT-PCR experiments.
